# Supplementary material for: Direct and indirect costs and cost-driving factors of Tuberous sclerosis complex in children, adolescents, and caregivers: a multicenter cohort study
Source: Orphanet J Rare Dis. 2021 Jun 21;16:282. doi: 10.1186/s13023-021-01899-x (PMC8218507; doi:10.1186/s13023-021-01899-x)
Supplement: Supplementary file 1 — Additional file 1. Supplementary Table 1. Direct costs related to TSC manifestations. [file 13023_2021_1899_MOESM1_ESM.docx]

Appendix Tables

Supplementary Table 1 Direct costs related to TSC manifestations

| Costs in organ systems | Grau et al. current study | Kingswood et al. 2016 a* | Kingswood et al. 2016 b* | Shepherd et al 2017* |
| --- | --- | --- | --- | --- |
| Mean PPPY | Mean PPPY | Mean PPPY | Mean PPPY |
| Epilepsie / nervous system1 | EUR 20,920 | GBP 4918 1 | GBP 5844 1 | GBP 1684 1, 2 |
| Structural brain disorders1 | EUR 21,284 | GBP 7603 1 | n.r. | GBP 8045 1 |
| Psychiatric disorders1 | EUR 25,488 | GBP 5325 1 | n.r. | n.r. |
| Heart and circulatory manifestations1 | EUR 23,020 | GBP 5527 1 | n.r. | GBP 6124 1 |
| Kidney and urinary tract manifestations1 | EUR 18,856 | GBP 5232 1 | GBP 1200 1, 2 | n.r. |
| Skin manifestations1 | EUR 18,704 | GBP 4417 1 | GBP 5844 1 | GBP 4644 1 |
| Respiratory manifestations1 | EUR 0 | GBP 13,664 1 | n.r. | GBP 13,110 1 |

1Calculated for one year, original cost figure given for a 3 year period,including GP administration encounters

2Only for one manifestation, baseline costs, they are added to all other manifestations

*Same study cohort
